1 **Phylogenomic data reveal how a climatic inversion and glacial refugia shape**  
2 **patterns of diversity in an African rain forest tree species**

3

4 Andrew J. Helmstetter<sup>1\*</sup>, Biowa E. N. Amoussou<sup>1,2</sup>, Kevin Bethune<sup>1</sup>, Narcisse G.  
5 Kandem<sup>3</sup>, Romain Glèlè Kakaï<sup>4</sup>, Bonaventure Sonké<sup>3</sup>, Thomas L. P. Couvreur<sup>1,3,5</sup>

6

7 <sup>1</sup> IRD, UMR DIADE, Univ. Montpellier, Montpellier, France

8 <sup>2</sup> Faculté des Sciences Agronomiques, Université d'Abomey-Calavi, 04 BP 1525,  
9 Cotonou, Benin

10 <sup>3</sup> Université de Yaoundé I, Ecole Normale Supérieure, Département des Sciences  
11 Biologiques, Laboratoire de Botanique systématique et d'Ecologie, B.P. 047,  
12 Yaoundé, Cameroon

13 <sup>4</sup> Laboratoire de Biomathématiques et d'Estimations Forestières, Université  
14 d'Abomey-Calavi, 03 BP 2819, Cotonou, Bénin

15 <sup>5</sup> Facultad de Ciencias Exactas y Naturales, Pontificia Universidad Católica del  
16 Ecuador, Av. 12 de Octubre 1076 y Roca, Quito, Ecuador

17

18 \* Corresponding Author

19 Email: [andrew.j.helmstetter@gmail.com](mailto:andrew.j.helmstetter@gmail.com)

20 Address:

21 UMR DIADE, équipe DYNADIV

22 Institut de recherche pour le développement (IRD)

23 911 avenue d'Agropolis, BP 64501

24 34394 Montpellier Cedex 5

25 France

26 **ABSTRACT**

27 The world's second largest expanse of tropical rain forest is in Central Africa and  
28 contains incredible species diversity. Population genetic studies have consistently  
29 revealed significant structure across central African rain forest plants, in particular a  
30 North-South genetic discontinuity close to the equator at the level of a climatic  
31 inversion. Here, we take a phylogeographic approach using 351 nuclear markers in  
32 112 individuals across the distribution of the African rain forest tree species *Annickia*  
33 *affinis* (Annonaceae). We show for the first time that the North-South divide is the  
34 result of a single major colonisation event across the climatic inversion from an  
35 ancestral population located in Gabon. We suggest that environmental differences  
36 across the inversion and associated trait divergence may have contributed to this  
37 phylogenetic discontinuity. We find evidence for inland dispersal, predominantly in  
38 northern areas, and variable demographic histories among genetic clusters, indicating  
39 that populations responded differently to past climate change. We show how newly-  
40 developed genomic tools can provide invaluable insights into our understanding of  
41 tropical rain forest evolutionary dynamics.

42

43 Keywords: Phylogenomics, phylogeography, rain forest, sequence capture, Africa,  
44 dispersal

45

46 **Abbreviations**

47 TRF = Tropical rain forest

48 CAR = central African rain forest

49 LGM = last glacial maximum

50 SFS = site frequency spectrum

51

52 **1 INTRODUCTION**

53 Tropical rain forests (TRFs) possess an incredibly diverse flora and fauna making up  
54 half of the world's biodiversity. Understanding how this diversity is generated is  
55 critical if we are to protect it (Mace et al. 2003). Central Africa hosts the world's  
56 second largest continuous extent of TRF (Linder 2001). Climatic fluctuations during  
57 the Pleistocene and associated glacial forest refugia are suggested to have influenced  
58 how genetic diversity is distributed in Central African rain forests (CAR) (Hardy et al.  
59 2013). However, the nature (Anhuf et al. 2006; Diamond and Hamilton 1980; Maley  
60 1996; Bonnefille 2007) and importance of forest refugia continue to be intensely  
61 debated (Cowling et al. 2008; Lezine et al. 2019). Population genetic studies within  
62 CAR plant species document differing levels of response to past climatic fluctuations  
63 (reviewed in Hardy et al. 2013). Conversely, one major phylogeographic pattern  
64 common to many CAR plant species studied is the existence of a phylogeographic  
65 barrier along a North-South axis around 0-3 degrees north (see Fig. 1A; Hardy et al.  
66 2013; Faye et al. 2016; Heuertz et al. 2014). There appears to be no visible geographic  
67 barrier to explain this break as continuous rain forest exists across the entire area. This  
68 North-South phylogeographic barrier corresponds, however, to the central African  
69 climatic hinge, an inversion zone between the northern and southern rainy seasons  
70 (Hardy et al; 2013). Interestingly, this barrier is rarely recovered in phylogeographic

71 studies of animals and thus seems to affect a greater effect on plants groups (e.g.  
72 Fuchs and Bowie 2015; Bohoussou et al. 2015; Bell et al. 2017; Blatrix et al. 2017).  
73  
74 Three main hypotheses have been suggested to explain how this North-South genetic  
75 discontinuity originated (Hardy et al. 2013). First, TRF might have disappeared  
76 (repeatedly) along the climatic hinge during past climatic fluctuations, isolating  
77 allopatric north/south populations, which subsequently recolonised the area. Second,  
78 because seasons are inverted across the hinge, flowering times might be displaced  
79 between northern and southern populations preventing interbreeding and gene flow.  
80 Third, successful colonisation across the climatic hinge may be limited by factors  
81 such as environmental differences (e.g. changing levels of water stress). At present,  
82 little is known about the relative importance of these three scenarios in generating the  
83 observed genetic discontinuity.

84

85 The phylogeographic approach (Avice et al. 1987) can unravel the history of  
86 populations, and ultimately uncover which processes have shaped current patterns of  
87 diversity. It is therefore an ideal framework to study how the climatic inversion, and  
88 other factors, have shaped patterns of intraspecific diversity in CAR plants. High-  
89 throughput sequencing allows the generation of phylogeographic datasets consisting  
90 of large numbers of independently segregating nuclear loci that can account for  
91 coalescent stochasticity (Edwards et al. 2016) where studies with small numbers of  
92 markers fall short. Phylogenomic data can also be used to reconstruct the spatial  
93 evolutionary history of species by inferring phylogenetic trees among populations and  
94 dispersal dynamics. These approaches can help us to understand relationships among

95 populations on either side of the climatic inversion and how often lineages traversed  
96 this barrier.

97

98 If glacial refugia have played an important role in CAR plant dynamics we would  
99 expect to find evidence of dispersal inland because most putative CAR refugia are  
100 located in the Atlantic Guineo-Congolian region (Fig. 1A; Maley 1996; Anhuf et al.  
101 2006). For example, within the palm species *Podococcus barteri*, modelling past  
102 ranges and genetic data supported the hypothesis of one large coastal refugia in  
103 western Gabon and southwestern Cameroon (Faye et al. 2016). Furthermore, we  
104 would expect population size to increase towards the present as populations spread  
105 out from climatically stable areas.

106

107 To develop upon our current understanding of the phylogeographic patterns  
108 introduced above, we present, for the first time using nuclear phylogenomic  
109 approaches, the evolutionary dynamics of a central African tree species, *Annickia*  
110 *affinis*. This species belongs to the pantropical plant family Annonaceae (Chatrou et  
111 al. 2012) growing up to 30 metres tall and typically inhabits primary, secondary and  
112 degraded rain forests (Versteegh and Sosef 2007). The species is widespread and  
113 common across Lower Guinea, from southern Nigeria to the western tip of  
114 Democratic Republic of Congo and is therefore ideal for studying CAR  
115 phylogeography and the nature of the climatic inversion as a phylogeographic barrier.

116

117 Here, we used a newly developed baiting kit (Couvreur et al. 2019) to sequence  
118 hundreds of nuclear markers in 112 individuals covering most of the distribution of *A.*  
119 *affinis*. First, we identified the major genetic clusters within *A. affinis* and their

120 distribution to test if *A. affinis* shows a North-South genetic structuring along the  
121 climatic inversion. Second, we built a phylogenetic hypothesis of relationships among  
122 genetic clusters and conducted spatiotemporal diffusion analyses to test if dispersal  
123 has been frequent across the climatic inversion, or if it has been restricted over time.  
124 We also test for an inland (west to east) dispersal pattern, congruent with expansion  
125 out of climatically stable areas. Finally, we reconstruct effective population size  
126 through time to infer the past demography of each identified genetic cluster to test for  
127 recent population expansion, and if demographic histories are congruent among  
128 clusters.

129

## 130 **2 MATERIAL AND METHODS**

### 131 **2.1 Sample collection**

132 A total of 112 individuals of *Annickia affinis* were sampled across most of the species  
133 distribution range in Central Africa (Table S1). In addition, two individuals were  
134 sampled from the sister species *Annickia polycarpa* as outgroups (Couvreur et al.  
135 2019).

136

### 137 **2.2 DNA extraction, gene capture and sequencing**

138 DNA was extracted from silica gel dried leaves using the MATAB (Sigma-Aldrich,  
139 Saint Louis, Missouri, USA) and chloroform separation methods following Couvreur  
140 et al. (2019). Nuclear markers were captured using the Annonaceae bait kit (Couvreur  
141 et al. 2019) made of 11,583 baits 120 bp long targeting 469 exonic regions. Barcoded  
142 Illumina libraries were constructed based on a modified protocol of Rohland and  
143 Reich (2012). See supplementary methods for details.

144

### 145 **2.3 Read filtering, contig assembly and multi-sequence alignment**

146 Reads were cleaned and filtered following the protocol in Couvreur et al. (2019) and  
147 Hybpiper (Johnson et al. 2016) was used to prepare sequence data for phylogenetic  
148 inference. Alignments were conducted using MAFFT (Katoh and Standley 2013) and  
149 cleaned with GBLOCKS (Castresana 2000). Putative paralogs for *A. affinis* that were  
150 flagged by Hybpiper were verified and removed during this processes. Further  
151 information can be found in the supplementary methods.

152

### 153 **2.4 Phylogenetic inference**

154 We filtered our dataset by choosing only those exons that had 75% of their length  
155 reconstructed in 75% of *A. affinis* individuals. We then used the corresponding  
156 supercontigs (i.e. targeted regions and surrounding off-target sequences) for  
157 phylogenetic inference. We added empty sequences when individuals were missing  
158 from locus alignments and we concatenated loci with the pxcat function from phyx  
159 (Brown et al. 2017). We assigned a different GTR+GAMMA model to each locus to  
160 account for differences in substitution rates. We then ran RAxML (v8.2.9)  
161 (Stamatakis 2014) using the '-f a' option with 100 replicates. The tree was rooted  
162 using *A. polycarpa* as outgroup. For comparison we also conducted a coalescent-  
163 based phylogenetic analysis using ASTRAL-III (Zhang et al. 2017), which uses  
164 individual gene trees to infer a species tree. Finally, we constructed a phylogenetic  
165 network using splitstree (v4.14.6; Huson and Bryant 2006) and the full SNP dataset  
166 (see below) using the neighbour-net algorithm.

167

### 168 **2.5 Phylogeographic Diffusion in Continuous Space**

169 We reconstructed the spatiotemporal dynamics of *A. affinis* using BEAST v1.8.4  
170 (Drummond and Rambaut 2007) and spread3 v0.9.6 (Bielejec et al. 2011). As this  
171 analysis is computationally intensive we used a subset of our dataset by selecting only  
172 the five most informative loci based on number of phylogenetic informative sites. We  
173 added a partition consisting of longitude and latitude coordinates as continuous trait  
174 data. We used a HKY+G substitution model and a strict clock model for each genetic  
175 locus and an exponential growth coalescent tree prior. We ran the analysis for 100  
176 million generations and assessed effective sample sizes (ESS) using Tracer v1.7  
177 (Rambaut et al. 2018). We then used spread3 to visualize the output at several time  
178 points during the history of *A. affinis*. We repeated this analysis with the next five  
179 most informative loci to ensure similar patterns were recovered across datasets.

180

## 181 **2.6 SNP calling**

182 We used SeCaPr (v1.1.4; Andermann et al. 2018) to call SNPs as it generates a  
183 pseudoreference made up of the consensus sequences for each target locus (paralogs  
184 removed) that is tailored to the given dataset, which is more efficient than the bait kit  
185 reference made from distantly related Annonaceae species. We then mapped our  
186 cleaned, paired reads to this pseudoreference using BWA (v0.7.12; Li and Durbin  
187 2009). Duplicates were removed and SNPs were called using HaplotypeCaller in  
188 GATK (v4.0; McKenna et al. 2010). We used bcftools (v1.8; Li 2011) to apply  
189 thresholds of mapping quality (>40%) depth (>25), quality by depth (>2) to filter  
190 SNPs. We also removed those SNPs with a minor allele frequency < 0.01, kept only  
191 biallelic SNPs and excluded monomorphic sites .

192

## 193 **2.7 Population genetic clustering and statistics**



194 We examined the genetic structure of *A. affinis* using three approaches. First, we  
195 undertook a Discriminant Analysis of Principal Components (DAPC) (Jombart et al.  
196 2010). We used the function *find.clusters* in the R package ‘adegenet’ (Jombart 2008)  
197 to identify clusters using successive K-means with 100,000 iterations per value of k  
198 and a maximum k value of 20. We identified the most appropriate number of clusters  
199 by examining the change in Bayesian Information Criterion (BIC) with increasing  
200 values of k (number of clusters). We then used the function *dapc* in order to define the  
201 diversity between the groups identified using *find.clusters*. We performed cross-  
202 validation of our DAPC analysis to ensure our chosen number of PCs was reliable.  
203 We used cluster membership inferred using DAPC to define populations for  
204 calculating summary statistics (see supplementary methods) and downstream  
205 analyses.

206

207 Second, we used TESS3 - an approach that takes into account geographic location  
208 information when inferring population clusters (Caye et al. 2016). TESS3 was  
209 implemented using the R package ‘tess3r’ (Caye et al. 2016). We used the projected  
210 least squares algorithm and a maximum k of 20. We examined the cross-validation  
211 score for each value of K to identify the appropriate number of clusters.

212

213 Third, we used fastSTRUCTURE (Raj et al., 2014) on a reduced set of unlinked SNPs  
214 (one per locus). We ran fastSTRUCTURE using the default settings and the simple  
215 prior. The script ‘chooseK.py’ was used to identify the number of clusters that  
216 maximized the marginal likelihood and explained the structure in the data.

217

218 **2.8 Demographic history**

219 We used stairway plot (v2; Liu and Fu 2015), a model-flexible approach that uses site  
220 frequency spectra (SFS) to infer changes in effective population size ( $N_e$ ) through  
221 time. We generated filtered VCF files representing each cluster as detailed above but  
222 did not apply a minor allele frequency filter. We then calculated folded SFS for each  
223 cluster. Stairway plot uses SNP counts to estimate the timing of events and changes in  
224  $N_e$  so the removal of SNPs with missing data may skew counts. To overcome this we  
225 modified each SFS by first calculating the minor allele frequency at each SNP and  
226 then multiplying this by the mean number of sequences (haploid samples) at each site.  
227 This results in a new SFS that makes use of all observed site frequencies and  
228 minimizes the number of SNPs removed. The total of samples is slightly reduced  
229 based on the amount of missing data. The number of random breakpoints were  
230 calculated as recommended in the manual. We used 67% of sites for training and  
231 performed 200 bootstrap replicates. The number of observed sites was calculated as  
232 the total length of the pseudoreference. We used an angiosperm wide mutation rate of  
233  $5.35 \times 10^{-9}$  sites/year (De la Torre et al. 2017) and a generation time of 15 years  
234 based on the generation time of the Annonaceae species *Annona crassiflora*  
235 (Collevatti et al. 2014). In addition, sequencing error can skew the SFS by inflating  
236 the number of singletons. We ran analyses using the entire SFS, and then reran with  
237 singletons removed to ensure similar histories were reached.

238

## 239 **2.9 Modelling of current and past ranges**

240 Current and Last Glacial Maximum (21k years ago; LGM) potential distributions  
241 were modelled using MaxEnt (v3.3.3; Phillips et al. 2006) as implemented in  
242 ‘biomod2’ (v3.3-7.1; Thuiller et al. 2009). Current and LGM (MIROC global  
243 circulation model) climatic data were downloaded from WordClim ver. 1.4 (Hijmans

244 et al. 2005) at a resolution of 10\*10 arc-minute. The LGM period represents the latest  
245 unfavourable climate for tropical species and is therefore a good period to model the  
246 impact of past climate change on potential range. A total of 346 presence data points  
247 (Table S1) covering the known distribution of *A. affinis* were spatially filtered to one  
248 point per cell to avoid overfitting due to sampling bias. Model overfitting was  
249 constrained by using the  $\beta$  regularization parameter in Maxent, which limits model  
250 complexity (Radosavljevic and Anderson 2014), and was set to 2.00 and 4.00, rather  
251 than the default MaxEnt value of 1.00. Modelling with all 19 bioclim variables  
252 produced unrealistic results and failed to properly model the current species range  
253 independent of the regularization parameter (results not shown). Using just eight  
254 bioclim variables (four precipitation and four temperature, see supplementary  
255 methods) greatly improved the accuracy of the models to the known distribution.  
256 Model performance was evaluated using a cross-validation procedure (Ponder et al.  
257 2001, Muscarella et al. 2014, see supplementary methods). Model fit was assessed  
258 using area under curve (AUC; Elith et al. 2006) and the true skill statistics (TSS,  
259 Allouche et al. 2006). The best fitting model was then projected into the LGM.

260

## 261 **3 RESULTS**

### 262 **3.1 Sequencing**

263 A total of 124.7 million reads were generated for 112 *A. affinis* individuals at an  
264 average coverage depth of 77.5x across all targeted loci. Using HybPiper we  
265 identified 366 loci where 75% of the exon length was recovered in at least 75% of  
266 individuals. A total of 15 loci showed signs of paralogy and were removed, leading to  
267 a final dataset of 351 supercontigs totalling 756 kb of sequence data. After cleaning

268 and filtering our SNP calling approach yielded 6,787 high-quality SNPs from 280  
269 different loci.

270

### 271 **3.2 How are populations structured across the range of *A. affinis*?**

272 After cross-validation, we chose to keep 40 PCA axes as this was shown to be  
273 appropriate for accurately inferring clusters (Fig. S1A). Changes in BIC greatly  
274 decreased after  $k = 4$  (Fig. S1B) suggesting that four clusters best fit our data (Fig.  
275 1A, Fig. S2). Two major clusters contained 35 and 63 individuals that were located  
276 primarily in Western Gabon (cluster WG) and Cameroon (cluster CA) respectively.  
277 Two smaller clusters of seven individuals each were located in eastern Gabon (cluster  
278 EG) and Gabon / Republic of Congo (cluster GC). There is a clear discontinuity in  
279 genetic structure across the equator, separating cluster CA from the rest, except for a  
280 pair of individuals belonging to cluster EG.

281

282 The TESS3 analysis also found that four clusters best defined our data (Fig. 1B, S3)  
283 with geographic discontinuities generally congruent between analyses (Fig. 1; Fig.  
284 S4). Individual admixture proportions revealed limited mixed ancestry within samples  
285 (Fig. 1B), except at a single location. The two northern most individuals belonging to  
286 cluster EG, found in at Meyo Centre in Cameroon (labelled in Fig. 1A), had a  
287 considerable proportion of their ancestry from cluster CA (Fig. 1B). The inverse was  
288 true of the two individuals from cluster CA that were from the same location. The  
289 fastSTRUCTURE analysis supported aforementioned analyses, even with a reduced  
290 SNP dataset. We found that  $k$  was between 3 and 5 and results closely mirrored  
291 DAPC clusters (Fig. S5). However, there was little evidence for admixture when

292 using this approach. Our inferred phylogenetic network (Fig. 1C) also revealed four  
293 major clusters, and that clusters WG & CA and EG & GC were grouped together.

294

### 295 **3.3 How did populations of *A. affinis* disperse across central Africa?**

296 The RAxML phylogenetic tree (Fig. 1D) was highly supported at deeper nodes,  
297 giving a reliable evolutionary history between major clades. The tree topology  
298 reflected our clustering inferences, lending further support to our four identified  
299 clusters and robust evidence for phylogeographic structuring. The topology of our  
300 ASTRAL tree was very similar to the RAxML tree (Fig. S6).

301

302 We assessed the geographic locations in these clusters at a finer scale by mapping  
303 each tip of the RAxML phylogenetic tree to its collection site (Fig. S7). We  
304 subdivided clusters WG and CA into major clades (I-IV) as points of reference (see  
305 Fig. 1). In cluster WG (Fig. S7C) the earliest diverging individuals are found at Mt.  
306 Cristal and in coastal rain forests in northwest Gabon. The remaining individuals in  
307 cluster WG formed a monophyletic group (clade I) and are found to the South and  
308 East, as far as the southern tip of the Republic of Congo. We then examined the  
309 geographic locations in cluster CA and identified three clades with distinct geographic  
310 distributions (Fig. S7D) going up the Cameroon's Atlantic coast. The middle and  
311 largest cluster extended inland. Given this structure we repeated DAPC clustering  
312 analyses using only cluster CA individuals and revealed fine-scale genetic structure  
313 that supported these three clades (Fig. S8).

314

315 Our diffusion analysis was based on 47.3kb of sequence data across five partitions  
316 and converged with the ESS > 200 for all parameters after 100 million generations.

317 The root was inferred to be around central Gabon (Fig. 2A). We estimated a single  
318 lineage crossed the climatic inversion, from South to North, establishing cluster CA  
319 (Fig. 2). Late in the evolutionary history of *A. affinis* another dispersal event crossed  
320 the barrier at Meyo Centre (see Fig. 1A). Our repetition of the diffusion analysis with  
321 different loci matched these patterns (Fig. S9) indicating our results are reliable and  
322 unlikely to have been biased by particular gene histories.

323

### 324 **3.4 Do different populations share similar demographic histories?**

325 We estimated the demographic history of the four DAPC clusters (Fig. 3; Fig S10-13  
326 for full plots). Over the last 100 thousand years (Ka) three clusters (GC, WG and CA)  
327 experienced similar demographic histories with population decline around 60-80 Ka  
328 followed by an increase in  $N_e$  towards the present. We found this increase began at  
329 different times across these three clusters though all show rapid increases in  
330 population size close to the end of the LGM, around 20 Ka. Cluster CA showed  
331 evidence of a rapid growth very close to the present, in the last 4 Ka. Cluster EG had a  
332 much different history, exhibiting a relatively constant population size throughout its  
333 history with a gradual decline in the last 10 Ka. Results were very similar when  
334 singletons were removed indicating that sequencing errors were not affecting our  
335 analyses (results not shown).

336

### 337 **3.5 Which areas have remained climatically stable over time?**

338 A total of 113 data points were retained after filtration. The best predictors were  
339 Precipitation of Wettest Month (Bio13) and Precipitation Seasonality (Bio15) (Table  
340 S2). A regularization multiplier of 2 generated a better model fit than with 4, showing  
341 a good visual match with the known distribution of the species at present (Fig. 4A).

342 The mean value of the AUC for the training and test data were respectively 0.77 and  
343 0.76. The mean value of TSS was 0.454, indicating that the model is better than a  
344 random model. During the LGM, the highest presence probabilities were all located  
345 along the Atlantic coast in Cameroon, Equatorial Guinea and Gabon (Fig. 4B).

346

## 347 **4 DISCUSSION**

### 348 **4.1 Limited dispersal across the climatic hinge**

349 Intraspecific diversity, based on phylogenomic nuclear sequence data, within the  
350 widespread tree species *Annickia affinis* is highly structured with a clear North-South  
351 divide between identified genetic clusters (Fig. 1). This is the first time this has been  
352 observed in plants using genomic data and adds to the growing evidence of an  
353 important phylogeographic barrier around a climatic hinge between 0 and 3°N in  
354 numerous CAR distributed plants (Hardy et al. 2013; Heuertz et al. 2014; Faye et al.  
355 2016; Ley et al. 2017; Pineiro et al. 2017). This North-South discontinuity is,  
356 however, generally not recovered in CAR distributed animals except in rare cases  
357 (e.g. Portik et al. 2017). This suggests that the processes taking place in relation to  
358 this barrier affect the flora of CARs more than the fauna. Indeed, Blatrix et al. (2017)  
359 showed that this barrier was more abrupt in the studied tree species (*Barteria*  
360 *fistulosa*) than within the associated symbiotic ants. However, the reasons for this  
361 genetic break in a seemingly continuous rain forest region remain little understood  
362 (Hardy et al. 2013).

363

364 Here, we show that, throughout the evolutionary history of *A. affinis*, a single major  
365 northward cross-hinge colonisation event occurred leading to the successful  
366 establishment of the Cameroon population (Fig. 2C). This result lends support to the

367 third hypothesis of Hardy et al. (2013), that possible environmental differences have  
368 prevented multiple establishments of populations crossing the hinge. Indeed, the small  
369 red to black fleshy fruits of *Annickia affinis* (Versteegh & Sosef, 2007) are frugivore-  
370 dispersed (Poulsen et al. 2001; Holbrook and Smith 2000) and can potentially travel  
371 long distances (> 500 m) for example by hornbills. Thus, the genetic structure of *A.*  
372 *affinis* in general, and the North-South divide in particular, is not linked to seed  
373 dispersal limitation *per se*.

374

375 We detected that one genetic cluster (cluster EG) extends across the climatic hinge  
376 into south Cameroon (Meyo Centre site, Fig. 1A) leading to a more recent,  
377 northwards migration event into the climatic hinge area (Fig. 2D). This indicates that  
378 the barrier is not entirely impassable, agreeing with other studies (Hardy et al. 2013;  
379 Duminil et al. 2015; Pineiro et al. 2017). The Meyo Centre site lies within the  
380 inversion zone and several individuals with mixed ancestry are found here (Fig. 1A,  
381 B). A similar result was found in *B. fistulosa*, with 20% of individuals sampled near  
382 1°N being hybrids (Blatrix et al. 2017). In addition, the general lack of evidence for  
383 admixture found between genetic clusters on either side of the inversion (Fig. 1B; Fig.  
384 S5) suggest that gene flow is nevertheless rare. The existence of hybrids in the  
385 absence of gene flow between clusters could be the result of intrinsic (developmental;  
386 environment independent) or extrinsic (environment dependent) post-zygotic  
387 isolation due to lower fitness of hybrids (Turelli et al. 2001; Blatrix et al. 2017). The  
388 example of Meyo Centre provides some evidence that even if dispersal across the  
389 hinge is possible, it doesn't result in the successful establishment of new populations,  
390 reinforcing the phylogenetic break over time. Hardy et al.'s (2013) hypotheses were  
391 not mutually exclusive and given that there is no clear barrier to dispersal of pollen or



392 seeds, there may be a role for divergence in traits such as flowering time causing  
393 reproductive isolation. This may in turn be linked to why successful establishment  
394 across the inversion is rare. However, more fine scale sampling and information on  
395 ecological differences among populations across the hinge will be needed to test these  
396 ideas. Interestingly, similar north-south phylogeographic breaks are also known from  
397 the Atlantic rain forests of Brazil, due to differing climatic regimes and floral  
398 compositions (Carnaval et al. 2014; Leite et al. 2016). This suggests that similar  
399 processes, though not necessarily driven by exactly the same factors, might be driving  
400 patterns of intraspecific diversity in different TRF regions.

401

#### 402 **4.2 Out-of-refugia migration in northern forests**

403 The inferred evolutionary dynamics of *A. affinis* support a role for Pleistocene forest  
404 oscillations in shaping intraspecific genetic diversity patterns. The four retrieved  
405 clusters are found in allopatry or parapatry (Fig. 1A). This supports the hypothesis of  
406 incomplete mixing after post-glacial expansion and is similar to patterns found in  
407 other CAR species (Hardy et al. 2013) and within species from other TRF regions  
408 (Carnaval et al. 2009; Leite and Rogers 2013). Evidence was found for recent  
409 demographic expansion in three clusters (CA, GC and WG, Fig. 3), as would be  
410 expected if *A. affinis* expanded out of refugia. These expansions were estimated to  
411 have taken place 15-25 Ka but we note that further work is needed to determine a  
412 more accurate mutation rate and generation time for *A. affinis* to verify the timing of  
413 these events. Therefore we avoid interpreting the exact timing of demographic events  
414 and instead focussed on the population size trends. Sampling sizes were also small ( $n$   
415 =7) for clusters GC and EG meaning we are less confident in the patterns  
416 reconstructed for these clusters. Similar patterns of recent expansion were detected in

417 populations of central African plants (Pineiro et al. 2017) and animals (Bell et al.  
418 2017) as well as in studies on neotropical flora (Vitorino et al. 2016) and fauna  
419 (Batalha-Filho et al. 2012). The refuge hypothesis has received support from  
420 population genetic studies of CAR plants, showing concordance between putative  
421 refugia and regions of high or unique allele/haplotype diversity (Lowe et al. 2010;  
422 Dauby et al. 2014; Heuertz et al. 2014; Faye et al. 2016). However, cluster EG  
423 showed constant population size with a slight decline towards the present, perhaps  
424 indicating that refugia have not played an important role in its demographic history.  
425 Similar demographic patterns were found in populations of two central African  
426 *Erythrophleum* species (Duminil et al. 2015) though these exhibited a more  
427 pronounced decline in the last 50 Ka. Overall, our results indicate that demographic  
428 responses to past climate change have been different among populations of *A. affinis*  
429 across central Africa. Similar patterns of recent expansion were detected in  
430 populations of central African plants (Pineiro et al. 2017) and animals (Bell et al.  
431 2017) as well as in studies on neotropical flora (Vitorino et al. 2016) and fauna  
432 (Batalha-Filho et al. 2012). The refuge hypothesis has received support from  
433 population genetic studies of CAR plants, showing concordance between putative  
434 refugia and regions of high or unique allele/haplotype diversity (Lowe et al. 2010;  
435 Dauby et al. 2014; Heuertz et al. 2014; Faye et al. 2016).

436

437 While our results are mixed, we do find evidence to support the scenario presented by  
438 Anhuf et al. (2006) who proposed that coastal rain forests in central Africa acted as  
439 refugia during the LGM. The modelled LGM distribution of *A. affinis* indicates that  
440 suitable habitat was concentrated continuously along the coast, from Cameroon to  
441 Gabon (Fig. 4B), like in the understory palm species *Podococcus barteri* (Faye et al.

442 2016). In addition, we uncovered fine-scale genetic structure and evidence for  
443 dispersal eastwards in Cameroon (Fig. 2), demonstrating a possible out-of-refugia  
444 pattern in this area.

445

446 In contrast, an inland pattern of migration was not found in Gabon where dispersal  
447 was both towards the east and west from a central area. This may be because there  
448 was a large amount of highly-suitable area ( $>0.8$ ) during the LGM that extended  
449 further from the coast in Gabon than in Cameroon (Fig. 4), meaning that populations  
450 could persist and expand out of this area. In addition, we inferred more pronounced  
451 East-West clustering (Fig. 1) in Gabon than in Cameroon, which has been observed in  
452 at least four other CAR tree species (Hardy et al. 2013). Bringing our results together,  
453 it appears that refugia may have played a different role for populations in different  
454 areas, and that each has responded to past climate in change in its own way.

455

## 456 **5 CONCLUSIONS**

457 This study uncovered the evolutionary dynamics and demographic history of the CAR  
458 tree species *Annickia affinis*. Our approach is the first to use genome-wide data from  
459 hundreds of nuclear loci to infer population-level phylogeographic patterns in CAR  
460 plants. We found high levels of genetic structure consistent with a pattern of North-  
461 South genetic discontinuity often recovered in this region. We highlighted how a  
462 climatic inversion limits colonisation and shapes patterns of population structure  
463 across a continuous rain forest region. We also show that the current distribution of  
464 extant populations is the result of different demographic histories and, in northern  
465 regions, migration inland from putative refugia in coastal rain forests. This study  
466 provides a proof-of-concept for future work taking advantage of recent genomic

467 resources, such as the sequence capture kit used here, to improve our understanding of  
468 TRF evolution, at the population level and above.

469

#### 470 **FUNDING**

471 This study was supported by the Agence Nationale de la Recherche (grant number  
472 ANR-15- CE02-0002-01 to TLPC).

473

#### 474 **ACKNOWLEDGEMENTS**

475 We thank Prof. Moutsambote, Raoul Niangadouma, Théophile Ayole for help in the  
476 field. The authors acknowledge the IRD itrop HPC (South Green Platform) at IRD  
477 Montpellier for providing HPC resources. We are grateful to the Centre National de la  
478 Recherche Scientifique et Technique (CENAREST), the Agence National des Parques  
479 Nationaux (ANPN) and Prof. Bourobou Bourobou for research permits (AR0020/16;  
480 AR0036/15 (CENAREST) and AE16014 (ANPN). Fieldwork in Cameroon was  
481 undertaken under the “accord cadre de cooperation” between the IRD and Ministère  
482 de la Recherche Scientifique et Technique (MINRESI). Prof. Bouka Biona of the  
483 Institut National de Recherche en Sciences Excates et Naturelles (IRSEN) of the  
484 Republic of Congo is thanked for research permits.

485

486 The authors have no competing interests.

487

488 **FIGURES**

489 Colour should be used for all figures

490

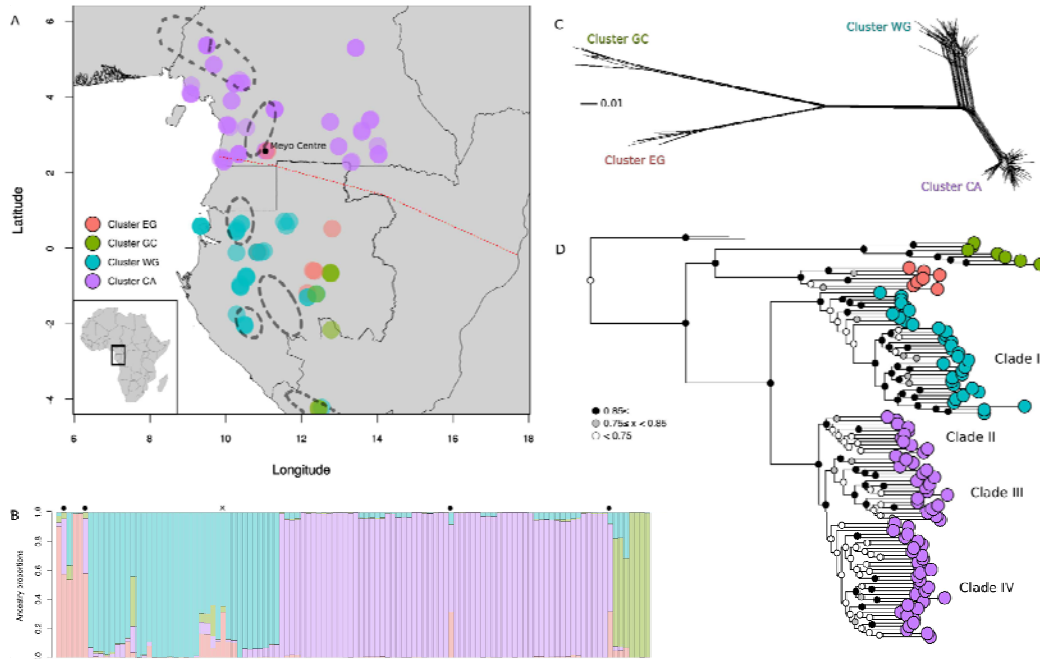

491 **Fig. 1.** (A) Map of the study region showing genetic clusters inferred using  
492 Discriminant analysis of principal components (DAPC,  $k=4$ ). Individuals are colour  
493 coded by cluster membership. Superimposed upon the map are the locations of  
494 putative glacial refugia (adapted from Faye et al. 2016). The climatic hinge is shown  
495 by a dashed red line. Inset is a map of the African continent showing highlighting the  
496 study area. (B) Barplot of ancestry proportions inferred using TESS ( $k=4$ ). Colours  
497 were made to correspond to those in Fig. 1A as clustering was almost identical  
498 between approaches. A single individual, “A\_affinis\_Ndjole\_5” (marked with an x),  
499 was inferred as cluster EG (red) in DAPC but TESS suggests the majority of its  
500 ancestry is instead from cluster WG (blue). Individuals from the “Meyo Centre”  
501 collection site (marked with a black circle in panel A) show evidence of admixture  
502 between clusters across the North-South climatic inversion. (C) Phylogenetic network

503 among *A. affinis* individuals constructed in splitstree using NeighbourNet algorithm  
504 based on 6787 SNPs. (D) RAxML tree representing relationships among *Annickia*  
505 *affinis* samples, rooted on two *A. polycarpa* samples. Support values are shown and  
506 tips are coloured based on genetic clustering results.  
507

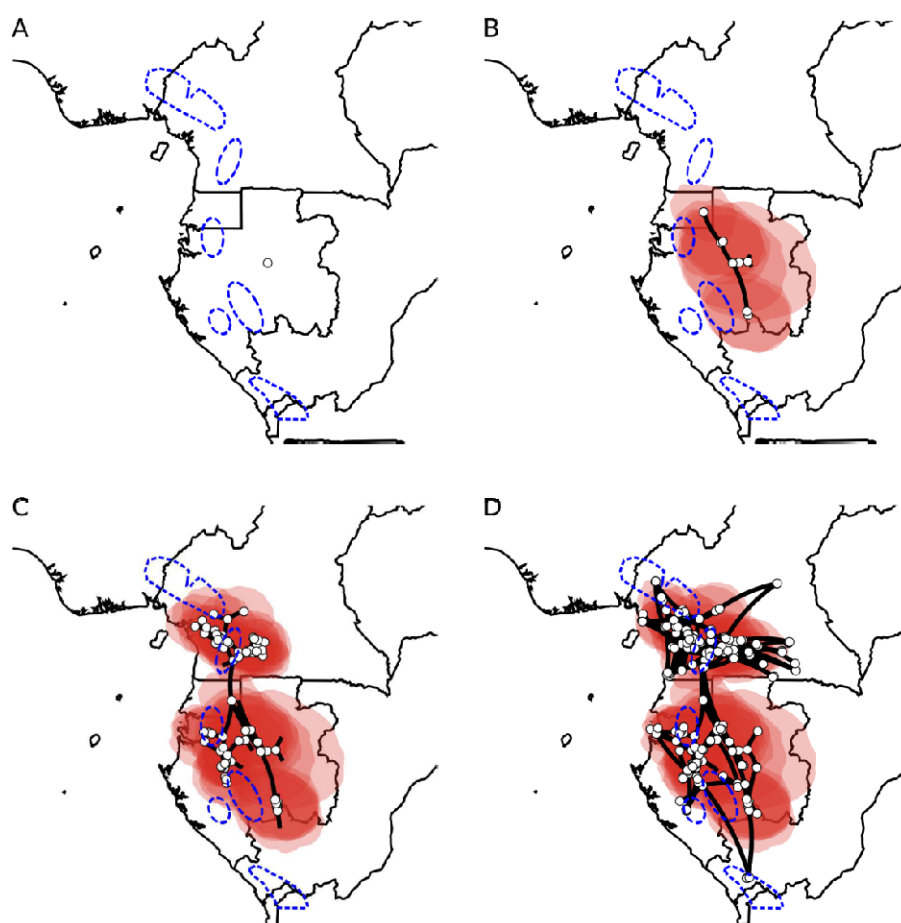

508

509 **Fig. 2.** Phylogeographic diffusion analysis split into four time slices. Images were  
510 rendered using spread3 and move forward through time starting from the  
511 (uncalibrated) time of the most recent common ancestor (A) to the present day (D).  
512 White circles represent ancestrally estimated geographic locations for nodes in the  
513 inferred phylogenetic tree, as well as current, real locations at tips. Polygons around  
514 points represent uncertainty of estimated ancestral locations at 80% highest posterior  
515 density (HPD). Putative refugia following Maley (1996) are shown in dashed blue  
516 lines.

517

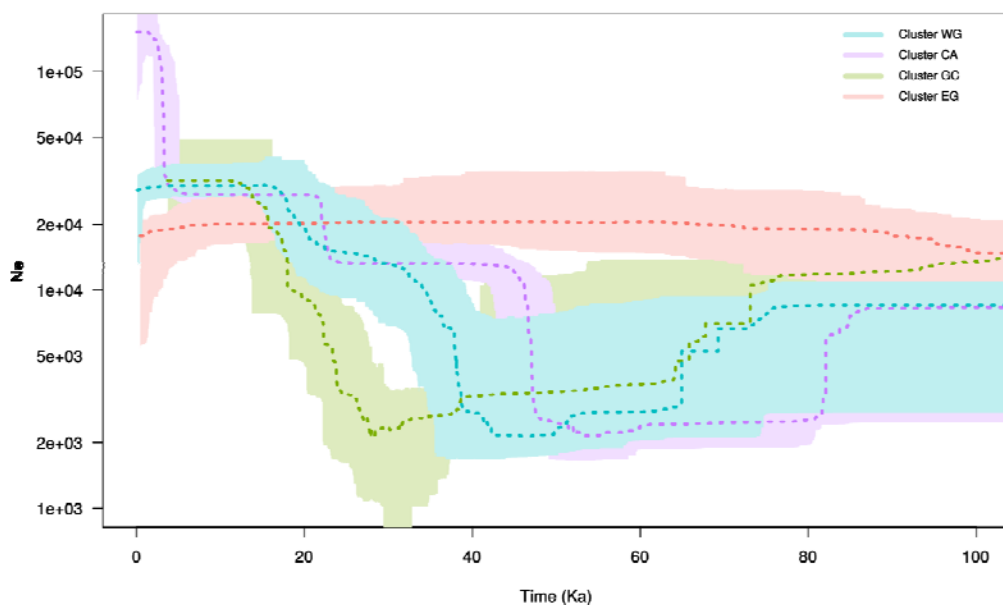

518

519 **Fig. 3.** Plots of effective population size through time for each of the four clusters  
520 inferred using stairway plot. The present is located on the left side of each graph. The  
521 dotted line represents the median population size and the shaded polygon represents  
522 the 80% central posterior density intervals. Colours correspond to the colours used in  
523 figure 1. Full plots of each species can be found in figures S10-13.

524



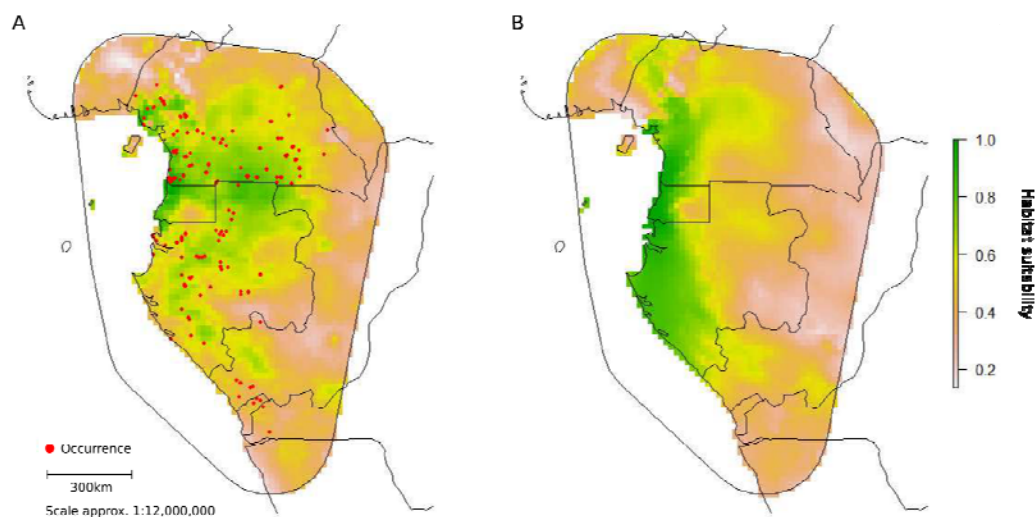

525

526 **Fig. 4.** Species distribution models (SDMs) for the present (A) and projected into the  
527 past, during the last glacial maximum (B). SDMs were constructed using MaxEnt and  
528 bioclimatic variables. The colour scale represents habitat suitability for each cell  
529 where green indicates more suitable cells. Red circles in (A) indicate sites where *A.*  
530 *affinis* individuals were collected and used in building the model.

531

532

533 **REFERENCES**

- 534 Allouche O, Tsoar A, Kadmon R. 2006 Assessing the Accuracy of Species  
535 Distribution Models: Prevalence, Kappa and the True Skill Statistic (TSS).  
536 *Journal of Applied Ecology* 43(6):1223–32. [https://doi.org/10.1111/j.1365-](https://doi.org/10.1111/j.1365-2664.2006.01214.x)  
537 [2664.2006.01214.x](https://doi.org/10.1111/j.1365-2664.2006.01214.x).
- 538 Andermann, T, Cano Á, Zizka A, Bacon C, and Antonelli A. 2018 SECAPR—a  
539 Bioinformatics Pipeline for the Rapid and User-Friendly Processing of  
540 Targeted Enriched Illumina Sequences, from Raw Reads to Alignments.  
541 *PeerJ* 6:e5175. <https://doi.org/10.7717/peerj.5175>.
- 542 Anhuf D, Ledru M-P, Behling H, Da Cruz FW, Cordeiro RC, Van der Hammen  
543 T, Karmann I et al. 2006 Paleo-Environmental Change in Amazonian and  
544 African Rainforest during the LGM. *Palaeogeography, Palaeoclimatology,*  
545 *Palaeoecology* 239(3–4):510–27.  
546 <https://doi.org/10.1016/J.PALAEO.2006.01.017>.
- 547 Avise, JC, Arnold J, Ball RM, Bermingham E, Lamb T, Neigel JE, Reeb CA,  
548 and Saunders NC. 1987. Intraspecific Phylogeography: The Mitochondrial  
549 DNA Bridge Between Population Genetics and Systematics. *Annual Review*  
550 *of Ecology and Systematics* 18(1):489–522.  
551 <https://doi.org/10.1146/annurev.es.18.110187.002421>.
- 552 Batalha-Filho H, Cabanne GS, Miyaki CY. 2012 Phylogeography of an Atlantic  
553 Forest Passerine Reveals Demographic Stability through the Last Glacial  
554 Maximum. *Molecular Phylogenetics and Evolution* 65(3):892–902.  
555 <https://doi.org/10.1016/j.ympev.2012.08.010>.
- 556 Bell, RC, MacKenzie JB, Hickerson MJ, Chavarría KL, Cunningham M,  
557 Williams S, and Moritz C. 2011 Comparative Multi-Locus Phylogeography

- 558 Confirms Multiple Vicariance Events in Co-Distributed Rainforest Frogs.  
559 *Proceedings of the Royal Society B: Biological Sciences* 279(1730):991–99.  
560 <https://doi.org/10.1098/rspb.2011.1229>.
- 561 Bielejec F, Rambaut A, Suchard MA and Lemey P. 2011 SPREAD: spatial  
562 phylogenetic reconstruction of evolutionary dynamics. *Bioinformatics*  
563 27(20):2910-2912.
- 564 Blatrix R, Peccoud J, Born C, Piatscheck F, Benoit L, Sauve M, Djiéto-Lordon C  
565 et al. 2017 Comparative Analysis of Spatial Genetic Structure in an Ant–  
566 Plant Symbiosis Reveals a Tension Zone and Highlights Speciation  
567 Processes in Tropical Africa. *Journal of Biogeography* 44(8):1856–68.  
568 <https://doi.org/10.1111/jbi.12972>.
- 569 Bohoussou KH, Cornette R, Akpatou B, Colyn M, Peterhans JK, Kennis J,  
570 Šumbera R et al. 2015 The Phylogeography of the Rodent Genus  
571 *Malacomys* Suggests Multiple Afrotropical Pleistocene Lowland Forest  
572 Refugia. *Journal of Biogeography* 42(11):2049–61.  
573 <https://doi.org/10.1111/jbi.12570>.
- 574 Bonnefille R. 2007. Rainforest responses to past climate changes in tropical  
575 Africa. In: Tropical rainforest responses to climate change (eds Bush MB,  
576 Flenley JR), pp.117–170, Praxis Publishing, Chichester
- 577 Brown, JW, Walker JF, Smith SA. 2017 Phyx: Phylogenetic Tools for Unix.  
578 *Bioinformatics* 33(12):1886–88.  
579 <https://doi.org/10.1093/bioinformatics/btx063>.
- 580 Carnaval, AC, Hickerson MJ, Haddad CFB, Rodrigues MT, and Moritz C. 2009  
581 Stability Predicts Genetic Diversity in the Brazilian Atlantic Forest Hotspot.  
582 *Science* 323 (5915):785–89. <https://doi.org/10.1126/science.1166955>.

- 583 Carnaval AC, Waltari E, Rodrigues MT, Rosauer D, VanDerWal J, Damasceno  
584 R, Prates I et al. 2014 Prediction of Phylogeographic Endemism in an  
585 Environmentally Complex Biome. *Proceedings of the Royal Society B:  
586 Biological Sciences* 281(1792):20141461.  
587 <https://doi.org/10.1098/rspb.2014.1461>.
- 588 Castresana J. 2000. Selection of Conserved Blocks from Multiple Alignments for  
589 Their Use in Phylogenetic Analysis. *Molecular Biology and Evolution* 17  
590 (4): 540–52. <https://doi.org/10.1093/oxfordjournals.molbev.a026334>.
- 591 Caye K, Deist TM, Martins H, Michel O, François O. 2016 TESS3: Fast  
592 Inference of Spatial Population Structure and Genome Scans for Selection.  
593 *Molecular Ecology Resources* 16(2):540–48. [https://doi.org/10.1111/1755-  
594 0998.12471](https://doi.org/10.1111/1755-0998.12471).
- 595 Chatrou LW, Pirie MD, Erkens RHJ, Couvreur TLP, Neubig KM, Abbott JR,  
596 Mols JB, Maas JW, Saunders RMK, Chase MW. 2012 A New Subfamilial  
597 and Tribal Classification of the Pantropical Flowering Plant Family  
598 Annonaceae Informed by Molecular Phylogenetics. *Botanical Journal of  
599 the Linnean Society* 169(1):5–40. [https://doi.org/10.1111/j.1095-  
600 8339.2012.01235.x](https://doi.org/10.1111/j.1095-8339.2012.01235.x).
- 601 Collevatti RG, Telles MP, Lima JS, Gouveia FO, Soares TN. 2014 Contrasting  
602 spatial genetic structure in *Annona crassiflora* populations from fragmented  
603 and pristine savannas. *Plant systematics and evolution* 300(7):1719-1727.
- 604 Couvreur TLP, Helmstetter AJ, Koenen EJM, Bethune K, Brandão RD, Little  
605 SA, Sauquet H, Erkens RHJ. 2019 Phylogenomics of the Major Tropical  
606 Plant Family Annonaceae Using Targeted Enrichment of Nuclear Genes.

- 607 *Frontiers in Plant Science* 9 (January). Frontiers:1941.  
608 <https://doi.org/10.3389/fpls.2018.01941>.
- 609 Cowling SA, Cox PM, Jones CD, Maslin MA, Peros M, Spall SA. 2008  
610 Simulated glacial and interglacial vegetation across Africa: implications for  
611 species phylogenies and trans-African migration of plants and animals.  
612 *Global Change Biology* 14:827–840. [https://doi.org/10.1111/j.1365-](https://doi.org/10.1111/j.1365-2486.2007.01524.x)  
613 [2486.2007.01524.x](https://doi.org/10.1111/j.1365-2486.2007.01524.x)
- 614 Dauby G, Duminil J, Heuertz M, Koffi GK, Stévant T, Hardy OJ. 2014  
615 Congruent Phylogeographical Patterns of Eight Tree Species in Atlantic  
616 Central Africa Provide Insights into the Past Dynamics of Forest Cover.  
617 *Molecular Ecology* 23(9):2299–2312. <https://doi.org/10.1111/mec.12724>.
- 618 De La Torre AR, Li Z, Van De Peer Y, Ingvarsson PK. 2017 Contrasting rates of  
619 molecular evolution and patterns of selection among gymnosperms and  
620 flowering plants. *Molecular Biology and Evolution* 34(6):1363–1377.
- 621 Diamond AW, Hamilton AC. 1980 The Distribution of Forest Passerine Birds  
622 and Quaternary Climatic Change in Tropical Africa. *Journal of Zoology* 191  
623 (3): 379–402. <https://doi.org/10.1111/j.1469-7998.1980.tb01465.x>.
- 624 Drummond AJ, Rambaut A. 2007 BEAST: Bayesian Evolutionary Analysis by  
625 Sampling Trees. *BMC Evolutionary Biology* 7(1):214.  
626 <https://doi.org/10.1186/1471-2148-7-214>.
- 627 Duminil J, Mona S, Mardulyn P, Doumenge C, Walmacq F, Doucet JL, Hardy  
628 OJ. 2015 Late Pleistocene Molecular Dating of Past Population  
629 Fragmentation and Demographic Changes in African Rain Forest Tree  
630 Species Supports the Forest Refuge Hypothesis. *Journal of Biogeography*  
631 42(8):1443–54. <https://doi.org/10.1111/jbi.12510>.

- 632 Edwards SV, Potter S, Schmitt CJ, Bragg JG, Moritz C. 2016 Reticulation,  
633 Divergence, and the Phylogeography–Phylogenetics Continuum.  
634 *Proceedings of the National Academy of Sciences* 113(29):8025–32.  
635 <https://doi.org/10.1073/pnas.1601066113>.
- 636 Elith J, Graham CH, Anderson RP, Dudík M, Ferrier S, Guisan A, Hijmans RJ et  
637 al. 2006 Novel Methods Improve Prediction of Species’ Distributions from  
638 Occurrence Data. *Ecography* 29(2):129–51.  
639 <https://doi.org/10.1111/j.2006.0906-7590.04596.x>.
- 640 Faye A, Deblauwe V, Mariac C, Richard D, Sonké B, Vigouroux Y, Couvreur  
641 TLP. 2016 Phylogeography of the Genus *Podococcus* (Palmae/Arecaceae)  
642 in Central African Rain Forests: Climate Stability Predicts Unique Genetic  
643 Diversity. *Molecular Phylogenetics and Evolution* 105:126–38.  
644 <https://doi.org/10.1016/j.ympev.2016.08.005>.
- 645 Fuchs J, Bowie, RC. 2015 Concordant genetic structure in two species of  
646 woodpecker distributed across the primary West African biogeographic  
647 barriers. *Molecular phylogenetics and evolution* 88:64–74.
- 648 Hardy OJ, Born C, Budde K, Daïnou K, Dauby G, Duminil J, Ewédjé EBK et al.  
649 2013 Comparative Phylogeography of African Rain Forest Trees: A Review  
650 of Genetic Signatures of Vegetation History in the Guineo-Congolian  
651 Region. *Comptes Rendus - Geoscience* 345(7–8):284–96.  
652 <https://doi.org/10.1016/j.crte.2013.05.001>.
- 653 Heuertz M, Duminil J, Dauby G, Savolainen V, Hardy OJ. 2014 Comparative  
654 Phylogeography in Rainforest Trees from Lower Guinea, Africa. *PLoS*  
655 *ONE* 9(1):e84307. <https://doi.org/10.1371/journal.pone.0084307>.

- 656 Hijmans RJ, Cameron SE, Parra JL, Jones PG, Jarvis A. 2005 Very High  
657 Resolution Interpolated Climate Surfaces for Global Land Areas.  
658 *International Journal of Climatology* 25(15):1965–78.  
659 <https://doi.org/10.1002/joc.1276>.
- 660 Holbrook KM, Smith TB. 2000 Seed dispersal and movement patterns in two  
661 species of *Ceratogymna* hornbills in a West African tropical lowland forest.  
662 *Oecologia* 125:249–257. <https://doi.org/10.1007/s004420000445>
- 663 Huson DH, Bryant D. 2006 Application of Phylogenetic Networks in  
664 Evolutionary Studies. *Molecular Biology and Evolution*. 23(2):254-267.  
665 <https://doi.org/10.1093/molbev/msj030>.
- 666 Johnson MG, Gardner EM, Liu Y, Medina R, Goffinet B, Shaw AJ, Zerega NJC,  
667 Wickett NJ. 2016 HybPiper: Extracting Coding Sequence and Introns for  
668 Phylogenetics from High-Throughput Sequencing Reads Using Target  
669 Enrichment. *Applications in Plant Sciences* 4(7):1600016.  
670 <https://doi.org/10.3732/apps.1600016>.
- 671 Jombart T. 2008 Adegenet: A R Package for the Multivariate Analysis of  
672 Genetic Markers. *Bioinformatics* 24(11):1403–5.  
673 <https://doi.org/10.1093/bioinformatics/btn129>.
- 674 Jombart T, Devillard S, Balloux F. 2010 Discriminant Analysis of Principal  
675 Components: A New Method for the Analysis of Genetically Structured  
676 Populations. *BMC Genetics* 11(1):94. [https://doi.org/10.1186/1471-2156-](https://doi.org/10.1186/1471-2156-11-94)  
677 [11-94](https://doi.org/10.1186/1471-2156-11-94).
- 678 Katoh K, Standley DM. 2013 MAFFT Multiple Sequence Alignment Software  
679 Version 7: Improvements in Performance and Usability. *Molecular Biology*  
680 *and Evolution* 30 (4): 772–80. <https://doi.org/10.1093/molbev/mst010>.

- 681       Leite RN, Rogers DS. 2013 Revisiting Amazonian Phylogeography: Insights into  
682            Diversification Hypotheses and Novel Perspectives. *Organisms Diversity &*  
683            *Evolution* 13(4):639–64. <https://doi.org/10.1007/s13127-013-0140-8>.
- 684       Leite, YLR, Costa LP, Loss AC, Rocha RG, Batalha-Filho H, Bastos AC,  
685        Quaresma VS et al. 2016 Neotropical Forest Expansion during the Last  
686        Glacial Period Challenges Refuge Hypothesis. *Proceedings of the National*  
687        *Academy of Sciences* 113(4):1008–13.  
688        <https://doi.org/10.1073/pnas.1513062113>.
- 689       Ley AC, Heuertz M, Hardy OJ. 2017 The Evolutionary History of Central  
690        African Rain Forest Plants: Phylogeographical Insights from Sister Species  
691        in the Climber Genus *Haumania* (Marantaceae). *Journal of Biogeography*  
692        44(2):308–21. <https://doi.org/10.1111/jbi.12902>.
- 693       Lézine AM, Izumi K, Kageyama M, Achoundong G. 2019 A 90,000-year record  
694        of Afromontane forest responses to climate change. *Science* 363(6423):177-  
695        181.
- 696       Li H. 2011 A statistical framework for SNP calling, mutation discovery,  
697        association mapping and population genetical parameter estimation from  
698        sequencing data. *Bioinformatics* 27(21), 2987-2993.
- 699       Li H, Durbin R. 2009 Fast and Accurate Short Read Alignment with Burrows-  
700        Wheeler Transform. *Bioinformatics* 25(14):1754–60.  
701        <https://doi.org/10.1093/bioinformatics/btp324>.
- 702       Liu X, Fu YX. 2015 Exploring population size changes using SNP frequency  
703        spectra. *Nature Genetics* 47, 555-559.



- 704 Linder HP. 2001 Plant Diversity and Endemism in Sub-Saharan Tropical Africa.  
705 In *Journal of Biogeography*, 28:169–82. <https://doi.org/10.1046/j.1365->  
706 2699.2001.00527.x.
- 707 Lowe AJ, Harris D, Dormontt E, Dawson IK. 2010 Testing Putative African  
708 Tropical Forest Refugia Using Chloroplast and Nuclear DNA  
709 Phylogeography. *Tropical Plant Biology* 3(1):50–58.  
710 <https://doi.org/10.1007/s12042-010-9045-2>.
- 711 Mace GM, Gittleman JL, Purvis A. 2003 Preserving the Tree of Life. *Science*  
712 300 (5626):1707–9. <https://doi.org/10.1126/science.1085510>.
- 713 Maley J. 1996 The African Rain Forest - Main Characteristics of Changes in  
714 Vegetation and Climate from the Upper Cretaceous to the Quaternary.  
715 *Proceedings of the Royal Society of Edinburgh Section B: Biological*  
716 *Sciences* 104:31–73. <https://doi.org/10.1017/S0269727000006114>.
- 717 McKenna A, Hanna M, Banks E, Sivachenko A, Cibulskis K et al. 2010 The  
718 Genome Analysis Toolkit: A MapReduce Framework for Analyzing next-  
719 Generation DNA Sequencing Data. *Genome Research* 20(9):254–60.  
720 <https://doi.org/10.1101/gr.107524.110.20>.
- 721 Muscarella R, Galante PJ, Soley-Guardia M, Boria RA, Kass JM, Uriarte M,  
722 Anderson RP. 2014 ENMeval: An R Package for Conducting Spatially  
723 Independent Evaluations and Estimating Optimal Model Complexity for  
724 Maxent Ecological Niche Models. *Methods in Ecology and Evolution*  
725 5(11):1198–1205. <https://doi.org/10.1111/2041-210x.12261>.
- 726 Phillips SJ, Anderson RP, Schapire, RE. 2006 Maximum Entropy Modeling of  
727 Species Geographic Distributions. *Ecological Modelling* 190(3–4):231–59.  
728 <https://doi.org/10.1016/j.ecolmodel.2005.03.026>.

- 729 Piñeiro R, Dauby G, Kaymak E, Hardy OJ. 2017 Pleistocene Population  
730 Expansions of Shade-Tolerant Trees Indicate Fragmentation of the African  
731 Rainforest during the Ice Ages. *Proceedings of the Royal Society B:*  
732 *Biological Sciences* 284(1866):20171800.  
733 <https://doi.org/10.1098/rspb.2017.1800>.
- 734 Portik DM, Leaché AD, Rivera D, Barej MF, Burger M et al. 2017 Evaluating  
735 mechanisms of diversification in a Guineo-Congolian tropical forest frog  
736 using demographic model selection. *Molecular Ecology* 26(19):5245-5263.
- 737 Ponder WF, Carter GA, Flemons P, Chapman RR. 2001 Evaluation of Museum  
738 Collection Data for Use in Biodiversity Assessment. *Conservation Biology*  
739 15 (3): 648–57. <https://doi.org/10.1046/j.1523-1739.2001.015003648.x>.
- 740 Poulsen JR, Clark CJ, Smith TB. 2001 Seed Dispersal by a Diurnal Primate  
741 Community in the Dja Reserve, Cameroon. *Journal of Tropical Ecology*  
742 17:787–808.
- 743 Radosavljevic A, Anderson RP. 2014 Making better Maxent models of species  
744 distributions: complexity, overfitting and evaluation. *Journal of*  
745 *Biogeography* 41:629–643. <https://doi.org/10.1111/jbi.12227>
- 746 Raj A, Stephens M, Pritchard JK. 2014 FastSTRUCTURE: Variational Inference  
747 of Population Structure in Large SNP Data Sets. *Genetics* 197(2):573–89.  
748 <https://doi.org/10.1534/genetics.114.164350>.
- 749 Rambaut A, Drummond AJ, Xie D, Baele G, Suchard MA. 2018 Posterior  
750 summarisation in Bayesian phylogenetics using Tracer 1.7. *Systematic*  
751 *Biology*. syy032. doi:10.1093/sysbio/syy032

- 752 Rohland N, Reich D. 2012. Cost-Effective, High-Throughput DNA Sequencing  
753 Libraries for Multiplexed Target Capture. *Genome Research* 22(5):939–46.  
754 <https://doi.org/10.1101/gr.128124.111>.
- 755 Stamatakis A. 2014 RAxML Version 8: A Tool for Phylogenetic Analysis and  
756 Post-Analysis of Large Phylogenies. *Bioinformatics* 30(9):1312–13.  
757 <https://doi.org/10.1093/bioinformatics/btu033>.
- 758 Thuiller W, Lafourcade B, Engler R, Araújo MB. 2009 BIOMOD – a platform  
759 for ensemble forecasting of species distributions. *Ecography* 32:369–373.  
760 <https://doi.org/10.1111/j.1600-0587.2008.05742.x>
- 761 Turelli M, Barton NH, Coyne JA. 2001 Theory and speciation. *Trends in*  
762 *Ecology & Evolution* 16:330–343. [https://doi.org/10.1016/S0169-](https://doi.org/10.1016/S0169-5347(01)02177-2)  
763 [5347\(01\)02177-2](https://doi.org/10.1016/S0169-5347(01)02177-2)
- 764 Versteegh CP, Sosef M. 2007 Revision of the African Genus *Annickia*.  
765 *Systematics and Geography of Plants* 77(1):91–118.  
766 <https://doi.org/10.1600/036364411X553108>.
- 767 Vitorino LC, Lima-Ribeiro MS, Terribile LC, Collevatti RG. 2016  
768 Demographical History and Palaeodistribution Modelling Show Range Shift  
769 towards Amazon Basin for a Neotropical Tree Species in the LGM. *BMC*  
770 *Evolutionary Biology* 16(1):1–15. [https://doi.org/10.1186/s12862-016-](https://doi.org/10.1186/s12862-016-0779-9)  
771 [0779-9](https://doi.org/10.1186/s12862-016-0779-9).
- 772 Zhang C, Sayyari E, Mirarab S. 2017 ASTRAL-III: Increased Scalability and  
773 Impacts of Contracting Low Support Branches. In *Lecture Notes in*  
774 *Computer Science (Including Subseries Lecture Notes in Artificial*  
775 *Intelligence and Lecture Notes in Bioinformatics)* 10562 LNBI:53–75.  
776 <https://doi.org/10.1007/978-3-319-67979->

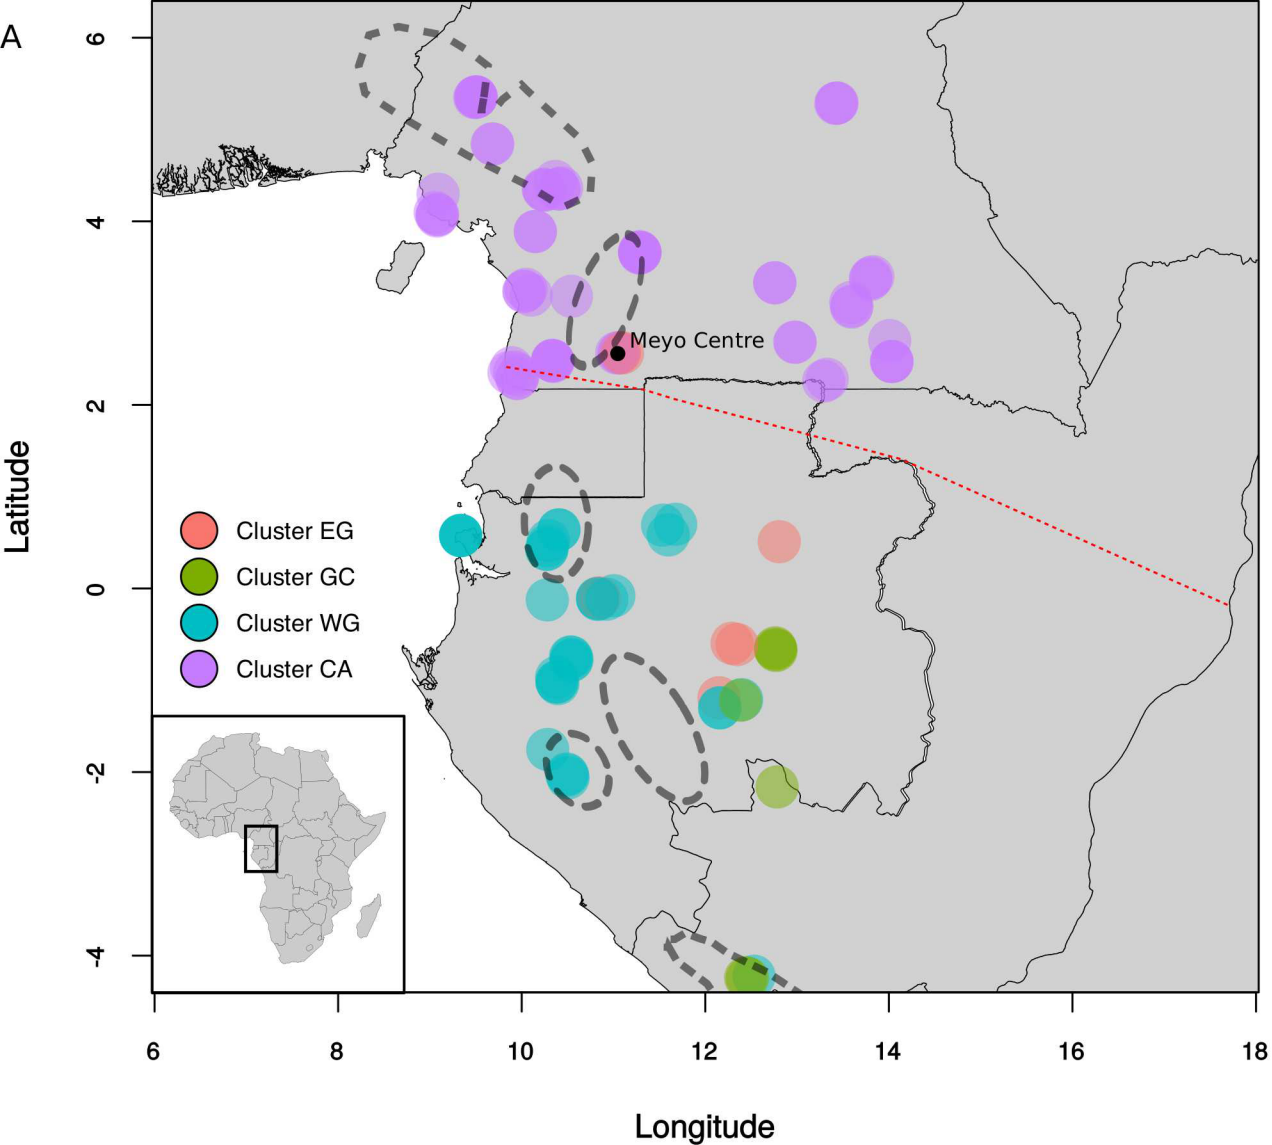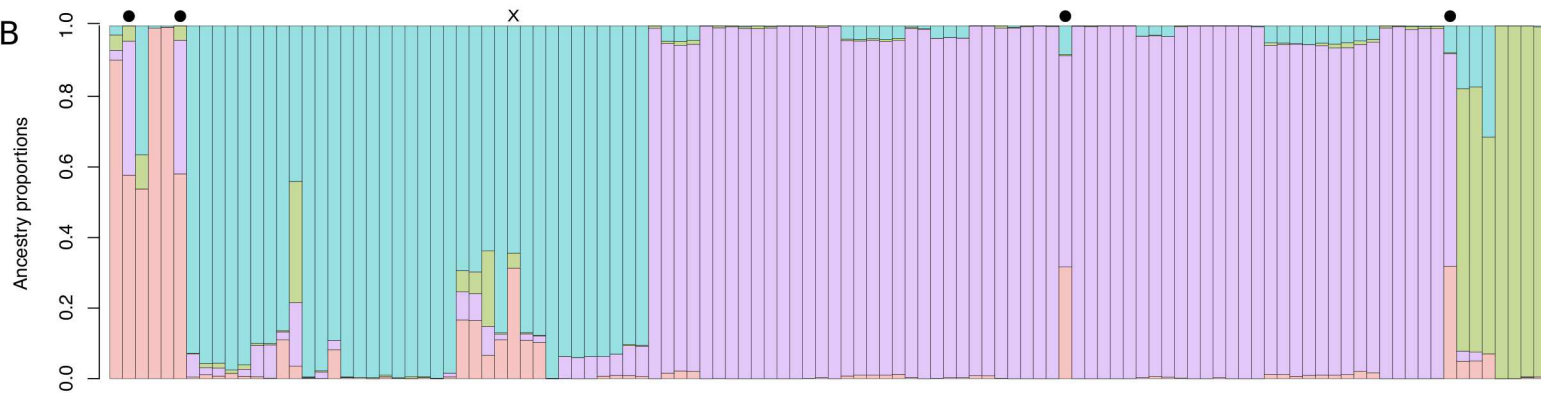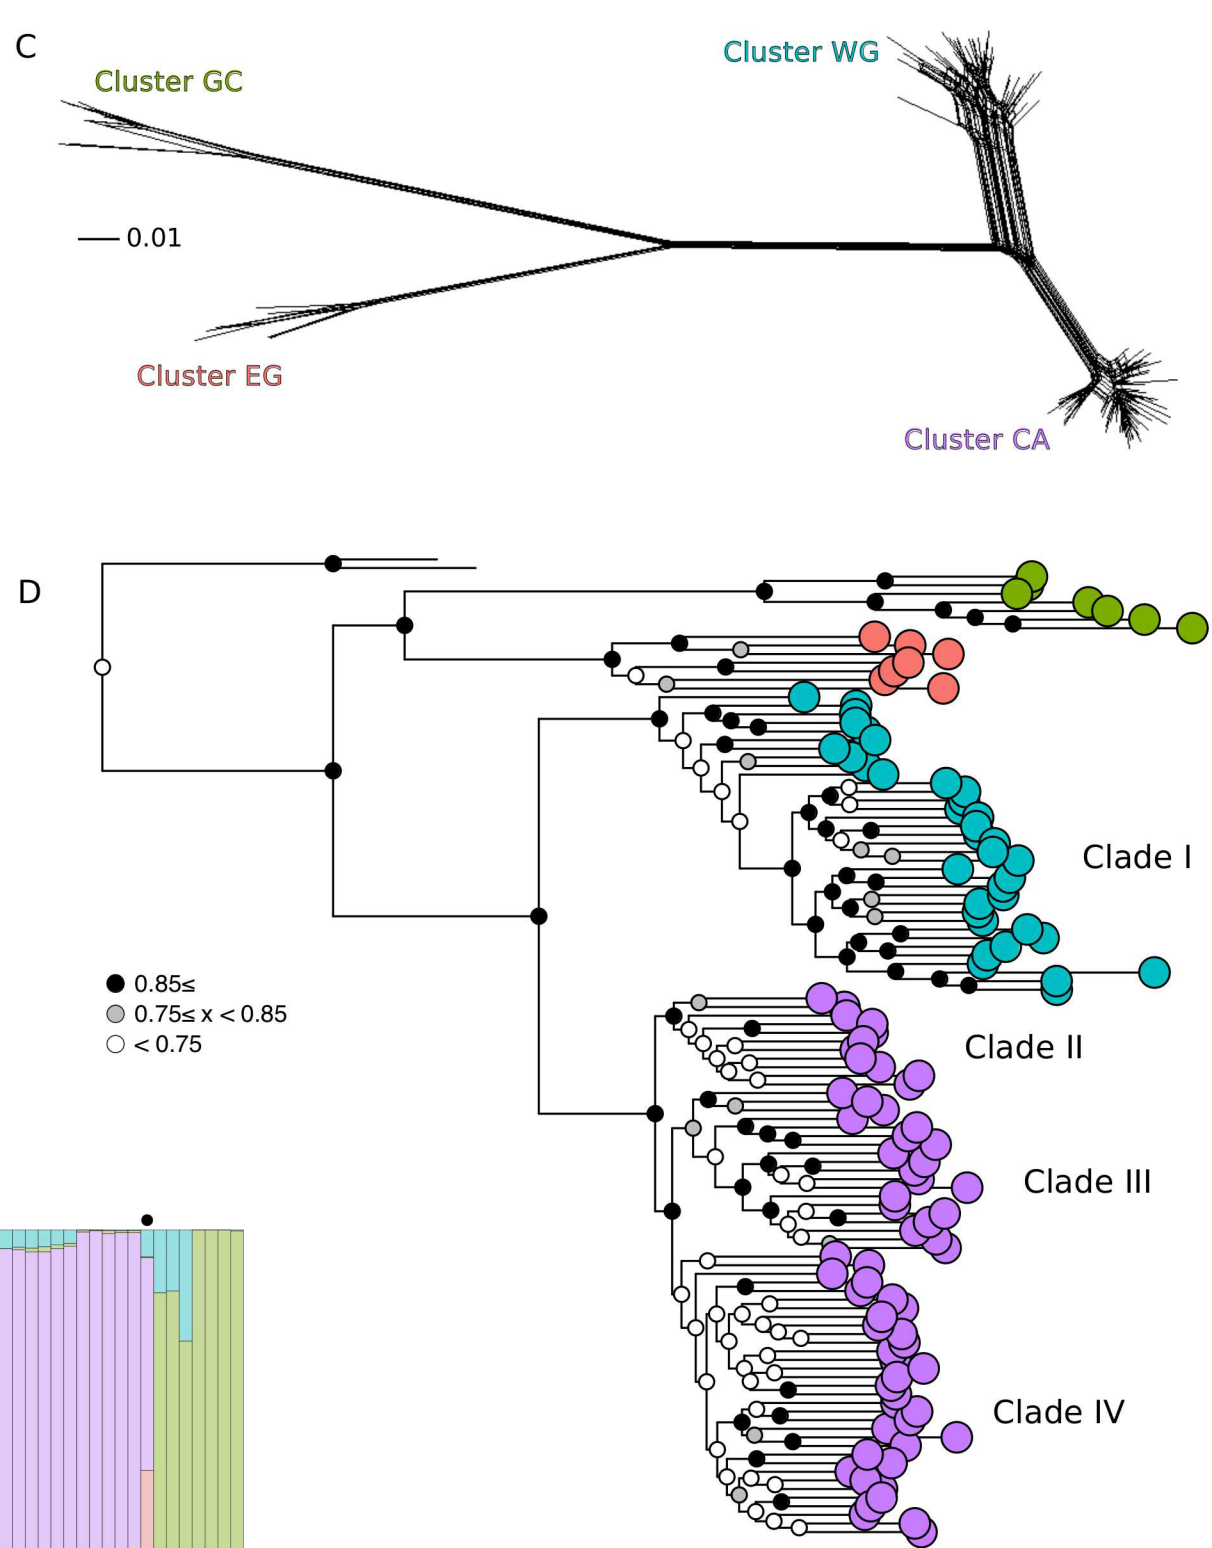

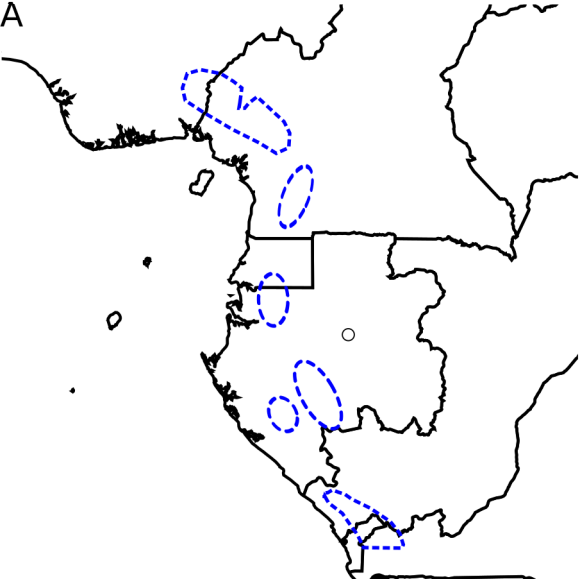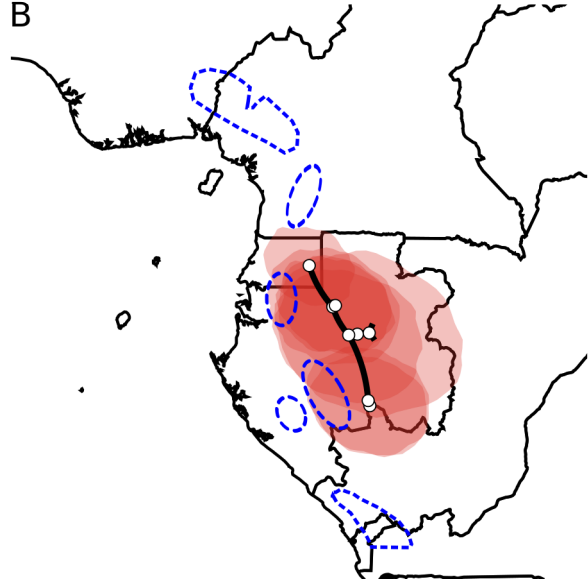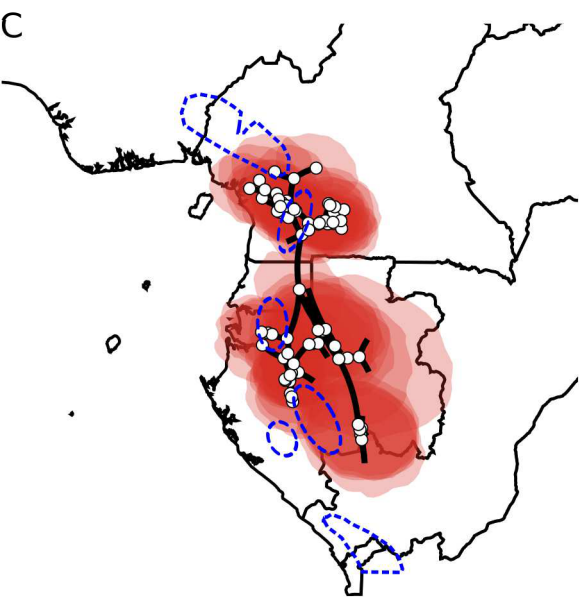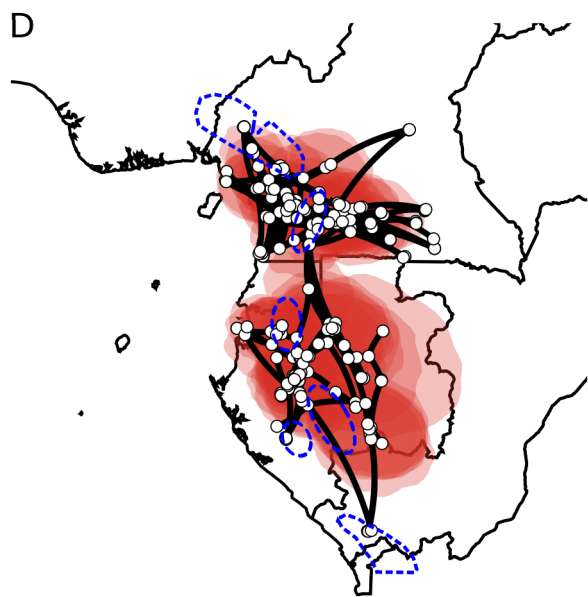

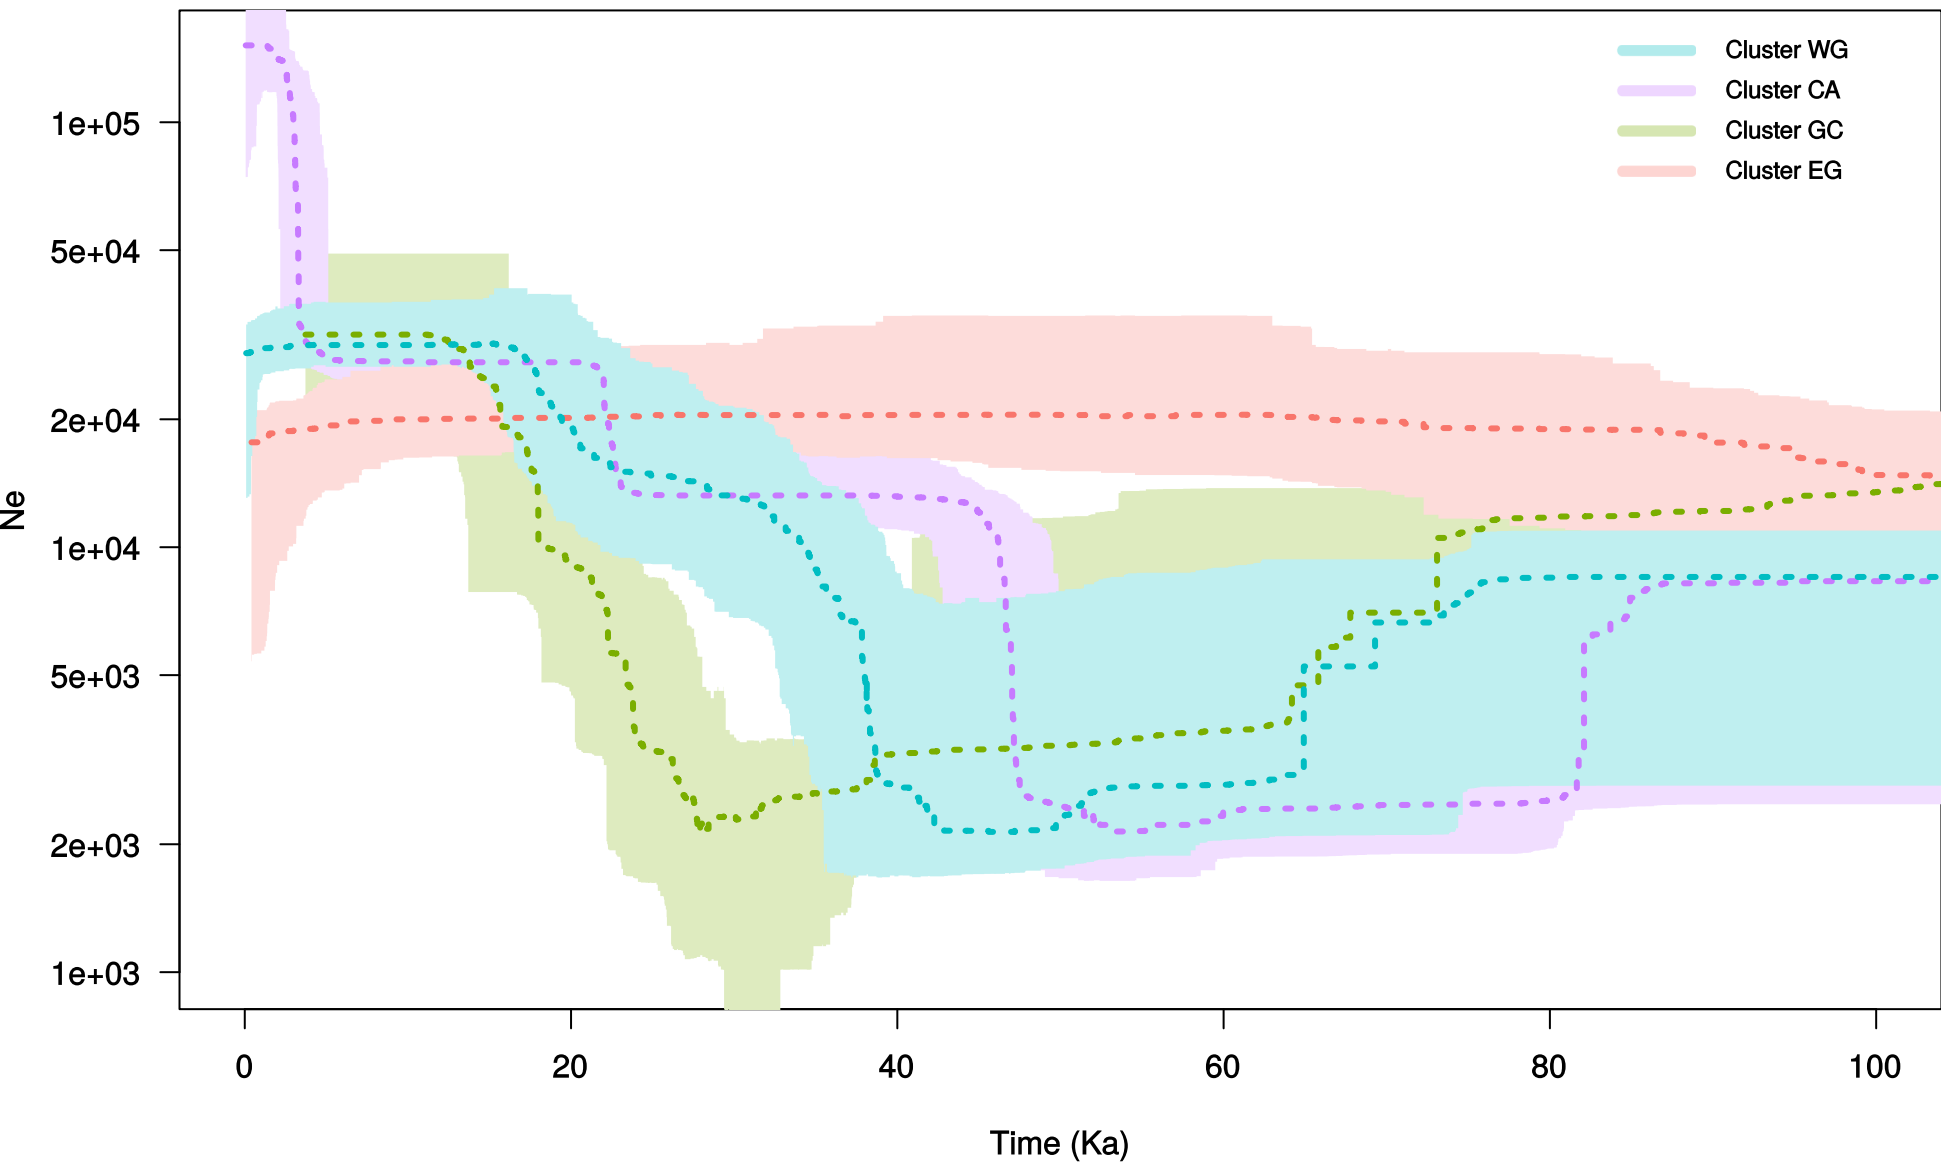

**A**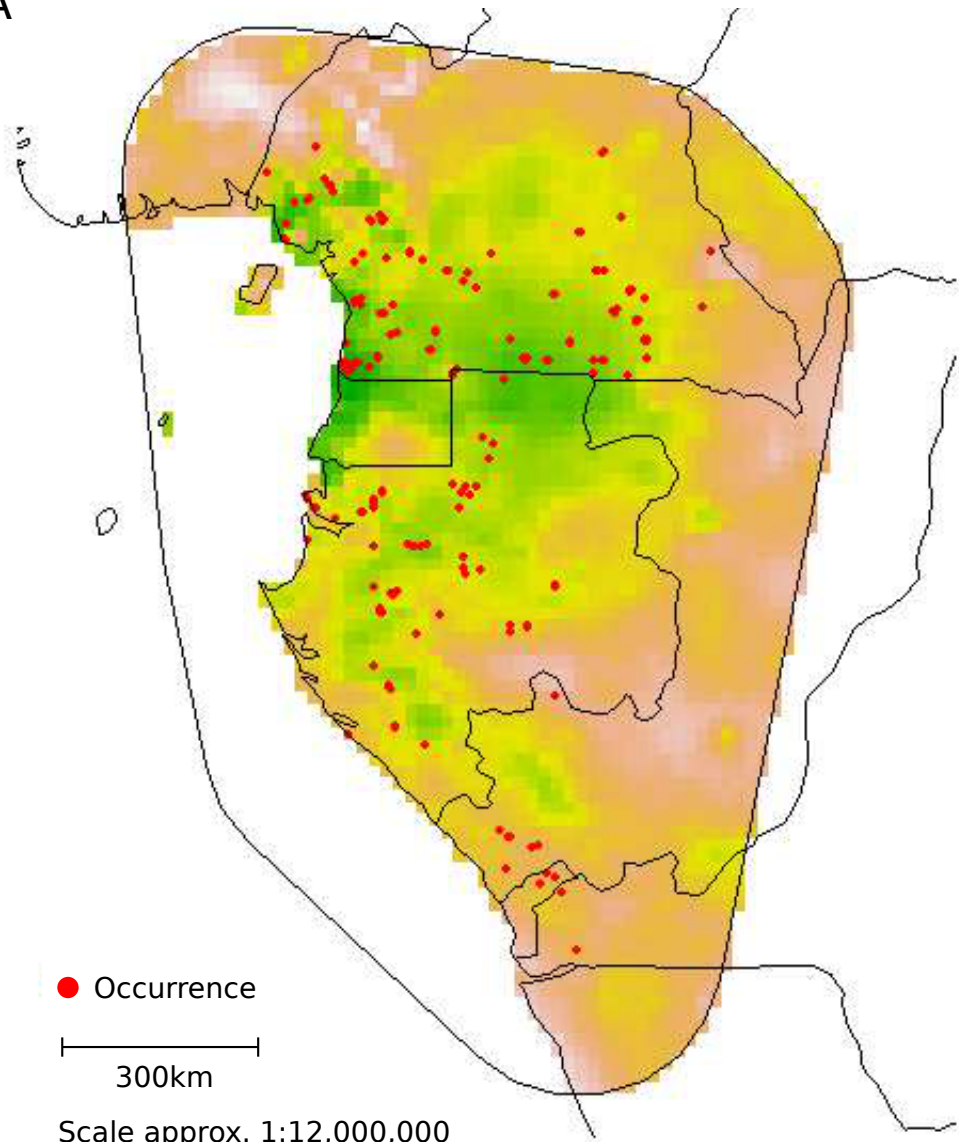**B**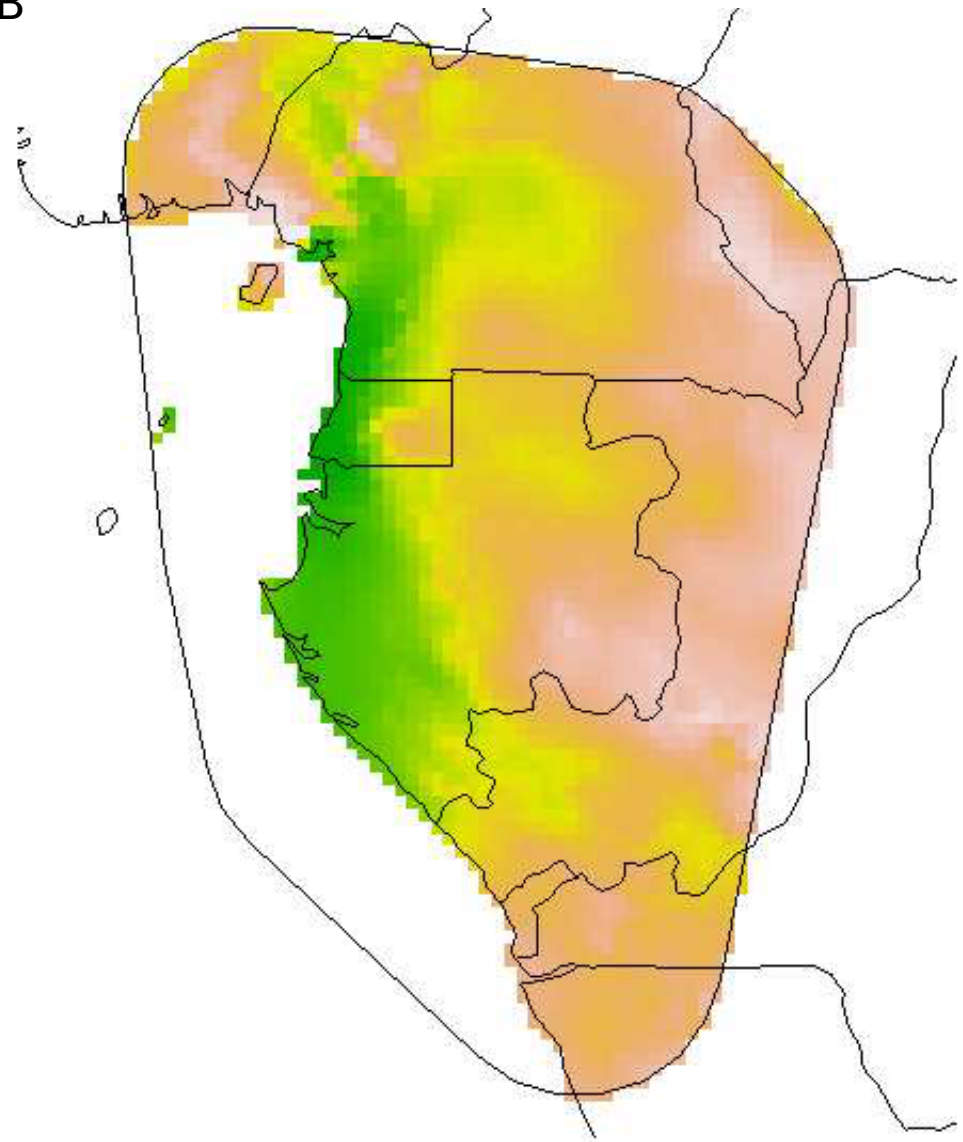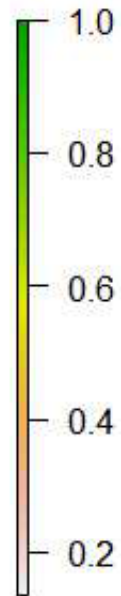

● Occurrence

300km

Scale approx. 1:12,000,000
